# Supplementary material for: Potential lncRNA Biomarkers for HBV‐Related Hepatocellular Carcinoma Diagnosis Revealed by Analysis on Coexpression Network
Source: Hindawi journal article supplement (doi:10.1155/2021/9972011), 2021-01-01

# Supplementary Figure

GSE84402

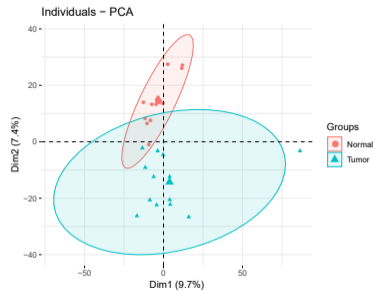

GSE55092

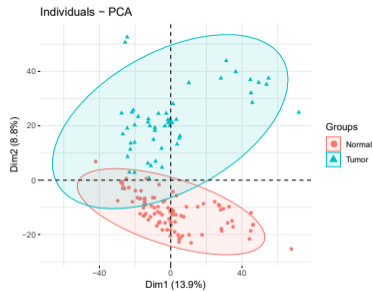

GSE19665

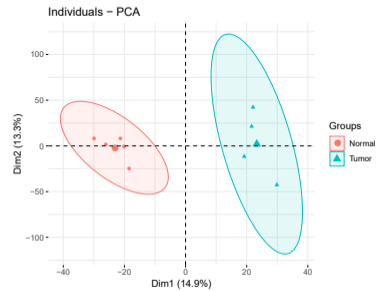

Supplement: f1 [file 9972011.f1.pdf]
